# Supplementary material
Source: Research Square preprint supplement (doi:10.21203/rs.3.rs-8883336/v1)
Supplement: Supplementary file 1 [file 678c16a7d8415468540796ed.docx]

**Real-Time BCI-Generated Ethnic-Inspired Music Based on Orff Principles: Effects on Relaxation and Potential Support for Language Development in Children with Autism Spectrum Disorder**

**Supplementary Material**

**Supplementary Table S1: Detailed Parameters for the Optimized Embedded Runge-Kutta 7(6) Pair**

The optimized tableau extends the Verner family with parameters tuned via differential evolution for enhanced performance on oscillatory problems. Selected non-zero and modified coefficients are listed; full tableau available upon request.

| Stage (i) |  | Selected |  |  |
| --- | --- | --- | --- | --- |
| 1 | 0 | - | 0.0794169052387116 | - |
| 2 | 0.173146279530013 | a_{2,1} = 0.173146279530013 | - | - |
| 4 | 0.245431154837642 | (optimized values) | - | - |
| ... | ... | ... | ... | ... |
| s | 1 | - | (final weights) | 0.064345053530889 |

*Note*: Complete 12-stage tableau and optimization script (differential evolution on harmonic/Duffing benchmarks) available from the corresponding author upon request.

**Supplementary Table S2: Example EEG Segment Selection and Preprocessing Details**

Selected 30-second resting-state segments prioritized dominant alpha power and low artefacts.

| Repository | Example Dataset ID/File | Channels Used | Selection Rationale |
| --- | --- | --- | --- |
| PhysioNet EEGMMIDB | S001R01.edf (eyes-open) | Cz, Pz | Clear alpha dominance, low movement |
| TUH EEG Corpus | 00001234/s001_2014_01_01/00001234_s001_t000.edf | Fp1–F4, C3–C4 | Strong 8–13 Hz peak in resting trace |
| OpenNeuro ds005385 | sub-01/task-restingstate_run-1_eeg.eeg | 64 channels | High-quality adult eyes-open resting |
| OpenNeuro ds004902 | sub-01_ses-01_task-rest_eeg.vhdr | 32 channels | Low-arousal baseline |

*Note*: Full list of 50 segments and exact preprocessing parameters available upon request.

**Supplementary Table S3: Extended Performance Metrics Across 50 Runs**

Mean ± SD for additional metrics.

| Method | Mean Global Error (L2 norm) | Phase Error (rad) | Mean MFCC Distance |
| --- | --- | --- | --- |
| Dormand-Prince 5(4) |  | 0.18 ± 0.04 | 0.42 |
| Verner 7(6) baseline |  | 0.12 ± 0.03 | 0.39 |
| Optimized 7(6) |  | 0.09 ± 0.02 | 0.36 |

**Supplementary Figure S1: Additional Examples of Generated Melodies**


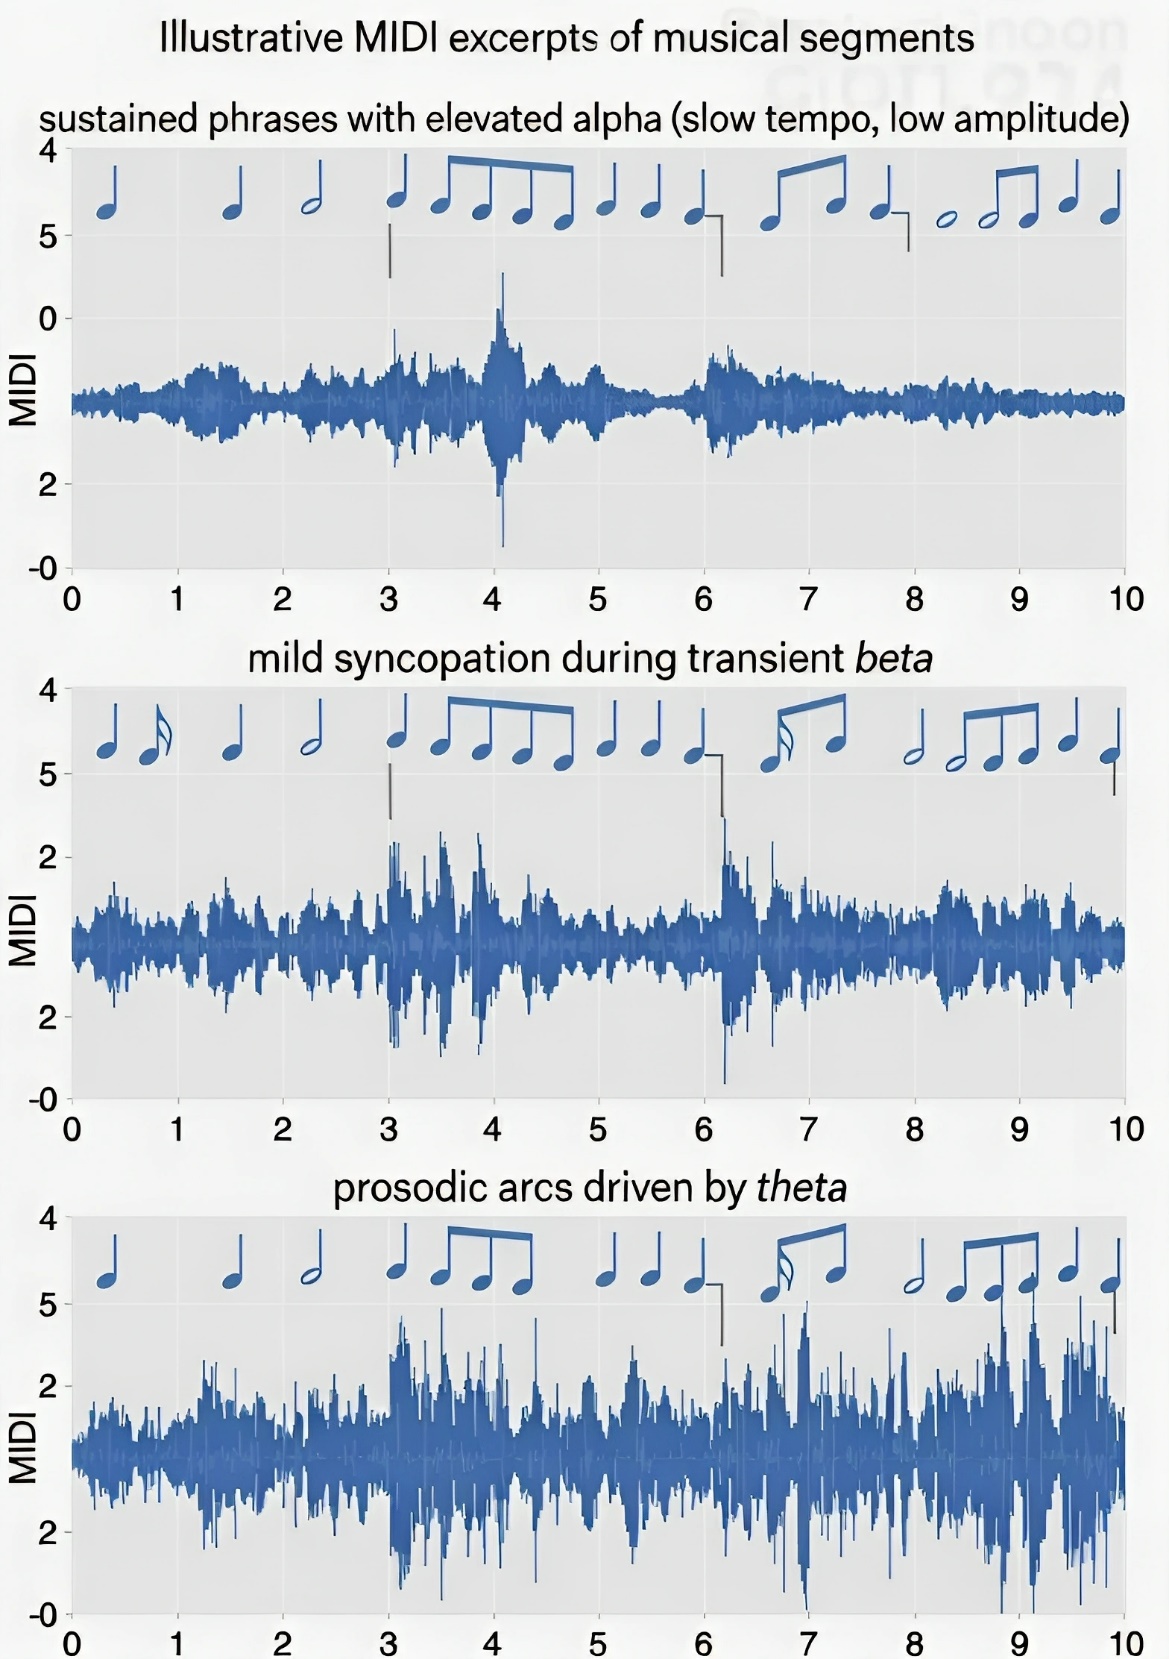


Three illustrative MIDI excerpts derived from low-arousal segments, showing:

- Sustained phrases with elevated alpha (slow tempo, low amplitude).
- Mild syncopation during transient beta.
- Prosodic arcs driven by theta.

(Notated excerpts and audio files available upon request.)

**Supplementary Note: Preprocessing and Replication Guidelines**

EEG preprocessing (MNE-Python v1.6+):

- Bandpass: 1–40 Hz
- Notch: 50 Hz
- ICA artefact removal (20 components)

Power estimation: Welch's method (2-s windows, 50% overlap).

Full replication scripts, including dataset download and segment selection, available from the corresponding author upon request.

These supplementary materials provide additional technical details and data supporting the main text analyses.
