# Supplementary material
Source: Research Square preprint supplement (doi:10.21203/rs.3.rs-8883336/v1)
Supplement: Supplementary file 2 [file d0d4b0f92a87db0875c67f6d.docx]

**Real-Time BCI-Generated Ethnic-Inspired Music Based on Orff Principles: Effects on Relaxation and Potential Support for Language Development in Children with Autism Spectrum Disorder**

Table 1. Jansen-Rit model parameters used in simulations

| Parameter | Description | Value | Units |
| --- | --- | --- | --- |
| A | Average excitatory synaptic gain | 3.25 | mV |
| B | Average inhibitory synaptic gain | 22 | mV |
| a | Excitatory time constant inverse | 100 | s⁻¹ |
| b | Inhibitory time constant inverse | 50 | s⁻¹ |
| C1–C4 | Connectivity constants | 135, 108, 33.75, 33.75 | - |
| v₀ | Firing threshold | 6 | mV |
| e₀ | Maximum firing rate | 2.5 | s⁻¹ |
| r | Sigmoid steepness | 0.56 | mV⁻¹ |

Table 2. Mapping of EEG frequency bands to musical parameters

| EEG Band | Frequency (Hz) | Power Influence on Music | Rationale (linked to language therapy) |
| --- | --- | --- | --- |
| Alpha | 8–13 | Decreases tempo (to 60 bpm min) and amplitude | Promotes calm, sustained phrases for emotional regulation (Mu, 2025) |
| Beta | 13–30 | Increases rhythmic density (adds mild syncopation when high) | Reflects arousal; regularity aids predictability in imitation (Chen, 2018) |
| Theta | 4–8 | Shapes pitch contour (rising/falling arcs) | Mimics intonation patterns supporting vocal prosody (Guan et al., 2025) |

Table 3. Preliminary performance summary across 50 runs

| Method | Mean function evaluations (per second simulated) | Relative efficiency gain | Mean MFCC distance to reference |
| --- | --- | --- | --- |
| Dormand-Prince 5(4) | 4 200 | Baseline | 0.42 |
| Verner 7(6) baseline | 2 800 | +33% | 0.39 |
| Optimised 7(6) | 2 100 | +50% | 0.36 |
